# Supplementary material for: National COVID-19 preparedness and response plans: a global review from the perspective of services for maternal, newborn, child and adolescent health and older people
Source: PubMed Central journal article supplement (PMC10928728; doi:10.1136/bmjgh-2023-013711), 2024-03-04
Supplement: bmjgh-2023-013711supp001.pdf [file bmjgh-2023-013711supp001.pdf]

## GOOGLE SEARCH TERMS

### English

[COUNTRY X] COVID-19 preparedness and response plan  
[COUNTRY X] COVID-19 preparedness and response strategy  
[COUNTRY X] COVID-19 pandemic plan  
[COUNTRY X] COVID-19 national action plan  
[COUNTRY X] COVID-19 public health institute

### French

[COUNTRY X NAME IN FRENCH] plan de préparation et de riposte COVID-19  
[COUNTRY X NAME IN FRENCH] plan de reponse COVID-19  
[COUNTRY X NAME IN FRENCH] plan d'action COVID-19  
[COUNTRY X NAME IN FRENCH] institut de santé publique COVID-19

### Portuguese

[COUNTRY X NAME IN PORTUGUESE] Plano nacional de contingência para o control da epidemia de doença por COVID-19  
[COUNTRY X NAME IN PORTUGUESE] Plano de resposta COVID-19  
[COUNTRY X NAME IN PORTUGUESE] plano de ação COVID-19  
[COUNTRY X NAME IN PORTUGUESE] instituto de saúde pública COVID-19

### Spanish

[COUNTRY NAME] Plan de Preparación y Respuesta ante la COVID-19  
[COUNTRY NAME] Programa de Emergencia de Apoyo y Preparación ante el COVID-19  
[COUNTRY NAME] Plan de acción nacional COVID-19  
[COUNTRY NAME] instituto de salud publica COVID-19
